# Supplementary material for: Hybrid SnO2–Co3O4nanocubes prepared via a CoSn(OH)6intermediate through a sonochemical route for energy storage applications
Source: Royal Society of Chemistry journal article supplement (doi:10.1039/c5ra25299g), 2016-01-01

## Supporting Information

### Hybrid $\text{SnO}_2\text{-Co}_3\text{O}_4$ nanocubes prepared via $\text{CoSn}(\text{OH})_6$ intermediate through sonochemical route for Energy Storage Applications

Balasubramaniam Gnana Sundara Raj<sup>a</sup>, Jerry J Wu<sup>b</sup>, Abdullah M. Asiri<sup>c</sup>, Sambandam Anandan<sup>a,\*</sup>

<sup>a</sup>Nanomaterials and Solar Energy Conversion Lab, Department of Chemistry, National Institute of Technology, Trichy 620 015, India.

<sup>b</sup>Department of Environmental Engineering and Science, Feng Chia University, Taichung 407, Taiwan.

<sup>c</sup>The Center of Excellence for Advanced Materials Research, King Abdulaziz University, Jeddah 21413, P.O. Box 80203, Saudi Arabia.

\*To whom correspondence should be addressed: E-mail: sanand@nitt.edu; sanand99@yahoo.com; Tel.: +91-431-2503639; Fax: +91 431 2500133.

**Figure S1.** FESEM images of (a) bare  $\text{SnO}_2$  and (b) pristine  $\text{Co}_3\text{O}_4$

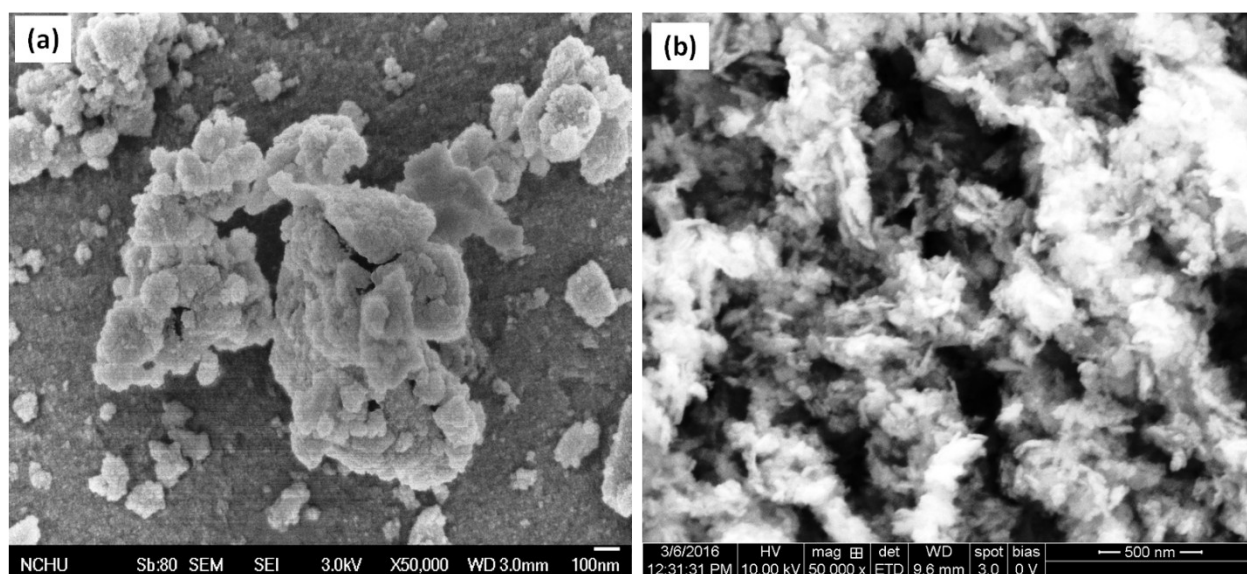

**Figure S2.** CV curve for (a) intermediate  $\text{CoSn(OH)}_6$  and (b) bare  $\text{SnO}_2$  at different scan rates  $5 \text{ mV s}^{-1}$ ,  $10 \text{ mV s}^{-1}$ ,  $20 \text{ mV s}^{-1}$ ,  $40 \text{ mV s}^{-1}$ ,  $80 \text{ mV s}^{-1}$ , and  $160 \text{ mV s}^{-1}$  in the potential range between 0 to +1 V vs. Ag/AgCl in aqueous solution of 1 M  $\text{Na}_2\text{SO}_4$  as electrolyte (a-f).

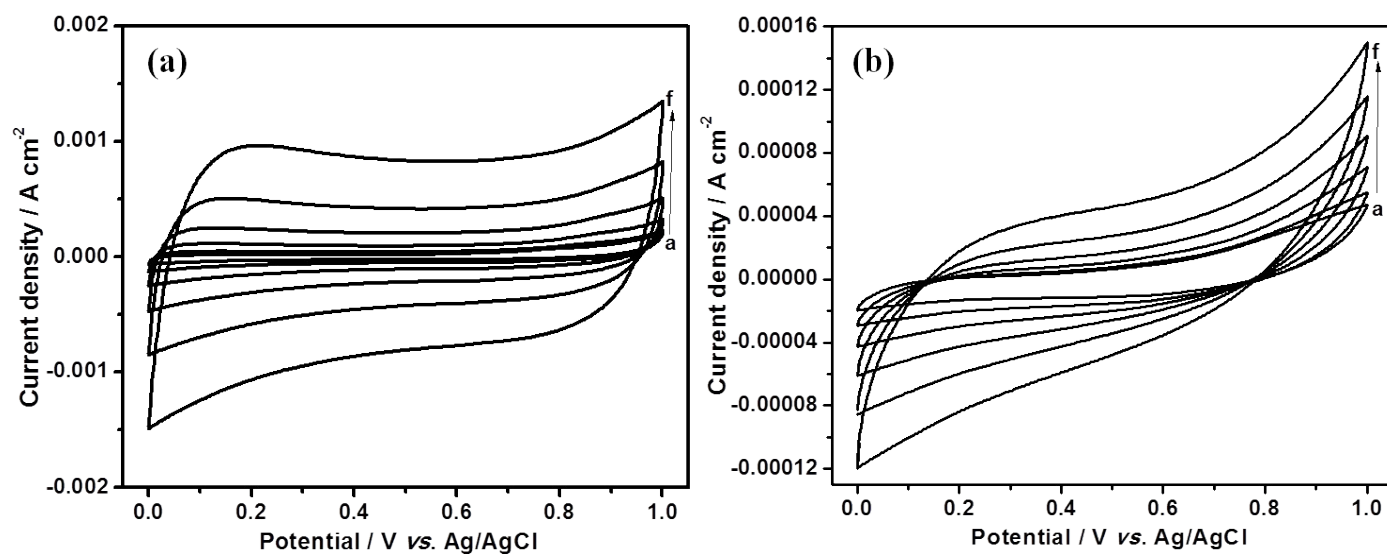

**Figure S3.** Charge–discharge cycles of (a) intermediate  $\text{CoSn}(\text{OH})_6$  and (b) bare  $\text{SnO}_2$  at a current density of  $0.5 \text{ mA cm}^{-2}$

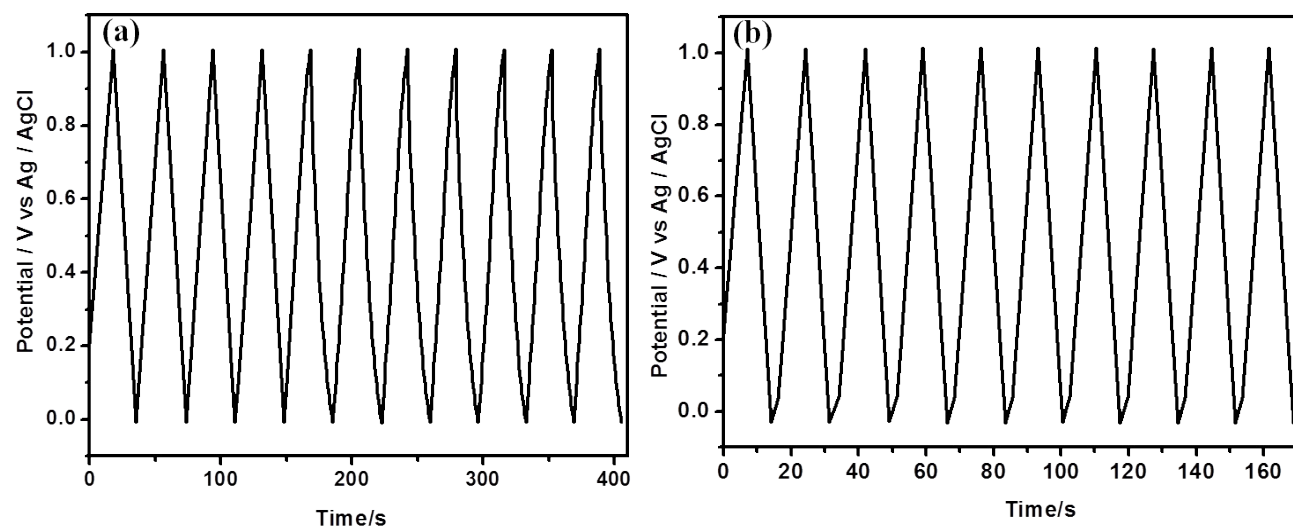

**Figure S4.** Cycling behavior of (a) intermediate  $\text{CoSn}(\text{OH})_6$  and (b) bare  $\text{SnO}_2$

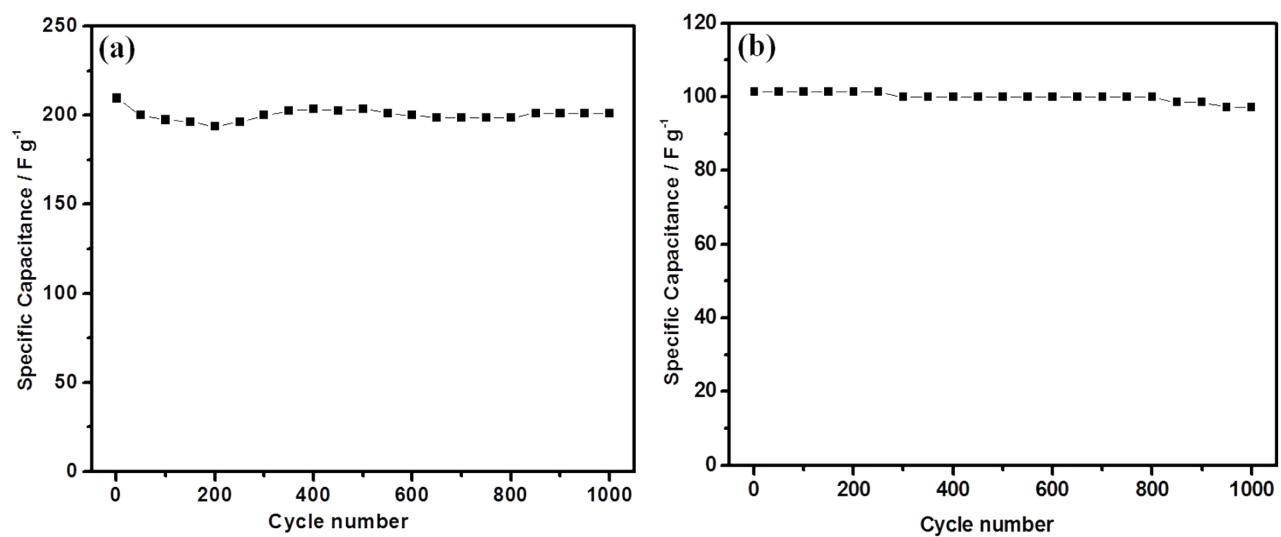

Supplement: c5ra25299g1.pdf [file c5ra25299g1.pdf]
